# Supplementary material
Source: PubMed Central journal article supplement (PMC7610790)
Supplement: EMS117985-supplement-PR_File_Lugli.pdf [file EMS117985-supplement-PR_File_Lugli.pdf]

## Peer Review Information

---

**Journal:** Nature Immunology

**Manuscript Title:** Two subsets of stem-like CD8<sup>+</sup> memory T cell progenitors with distinct fate commitments in 6 humans

**Corresponding author name(s):** Enrico Lugli

### Reviewer Comments & Decisions:

#### Decision Letter, initial version:

**Subject:** Decision on Nature Immunology submission NI-A29689A

**Message:** 27th May 2020

Dear Dr Lugli,

Thank you for our discussion the other day your response to the Referee issues - this was helpful for our decision-making.

We are interested in the possibility of publishing your study in Nature Immunology, but would like to consider your response to these concerns in the form of a revised manuscript before we make a final decision on publication.

We therefore invite you to revise your manuscript taking into account all reviewer and editor comments. Note, I've marked-up your response letter with some comments to help guide your revision (see attached). Please highlight all changes in the manuscript text file in Microsoft Word format.

We are committed to providing a fair and constructive peer-review process. Do not hesitate to contact us if there are specific requests from the reviewers that you believe are technically impossible or unlikely to yield a meaningful outcome.

When revising your manuscript:

\* Include a "Response to referees" document detailing, point-by-point, how you addressed each referee comment. If no action was taken to address a point, you must provide a compelling argument. This response will be sent back to the referees along with the revised manuscript.

\* If you have not done so already please begin to revise your manuscript so that it conforms to our Article format instructions at <http://www.nature.com/ni/authors/index.html>. Refer also to any guidelines provided in this letter.

\* Please include a revised version of any required reporting checklist. It will be available to referees to aid in their evaluation of the manuscript goes back for peer review. They are available here:

Reporting summary:

<https://www.nature.com/documents/nr-reporting-summary.pdf>

Please use the link below to submit your revised manuscript and related files:  
[REDACTED]

**Note:** This URL links to your confidential home page and associated information about manuscripts you may have submitted, or that you are reviewing for us. If you wish to forward this email to co-authors, please delete the link to your homepage.

We hope to receive your revised manuscript within two weeks. If you cannot send it within this time, please let us know. We will be happy to consider your revision so long as nothing similar has been accepted for publication at Nature Immunology or published elsewhere.

Please do not hesitate to contact me if you have any questions or would like to discuss these revisions further.

Nature Immunology is committed to improving transparency in authorship. As part of our efforts in this direction, we are now requesting that all authors identified as 'corresponding author' on published papers create and link their Open Researcher and Contributor Identifier (ORCID) with their account on the Manuscript Tracking System (MTS), prior to acceptance. ORCID helps the scientific community achieve unambiguous attribution of all scholarly contributions. You can create and link your ORCID from the home page of the MTS by clicking on 'Modify my Springer Nature account'. For more information please visit [www.springernature.com/orcid](http://www.springernature.com/orcid).

We look forward to seeing the revised manuscript and thank you for the opportunity to review your work.

Sincerely,

Zoltan Fehervari, Ph.D.  
Senior Editor  
Nature Immunology

The Macmillan Building  
4 Crinan Street  
Tel: 212-726-9207  
Fax: 212-696-9752  
[z.fehervari@nature.com](mailto:z.fehervari@nature.com)

Referee expertise:

Referee #1: T cell differentiation, exhaustion

Referee #2: T cell differentiation, exhaustion

Reviewers' Comments:

Reviewer #1:

Remarks to the Author:

The study by Galletti uses a sophisticated state-of-the-art strategy of combining scRNAseq and high-dimensional flow cytometry profiling to resolve the heterogeneity of human memory T cells. They make the surprising discovery that the human memory population contains a subset that is transcriptionally, functionally and epigenetically very similar to the progenitors of T cell exhaustion found in chronic infection and tumors. Moreover, the authors show that these T cells bear a unique TCR repertoire. This points out that the cells develop independently from other memory populations and that they recognize a unique antigen-repertoire. The data is therefore an elegant demonstration that sheds new light on the phenomenon of T cell exhaustion. It points out that the phenotype we normally associate with rare or very specific diseases (certain chronic infections and cancer) are nothing uncommon. Instead, cells with features of T cell exhaustion seem to comprise a significant fraction of the normal T cell repertoire.

At the same time, I found another point very important and interesting, which the authors in my opinion did not feature prominently enough. It is widely believed that Tscm constitute a superior quality of memory T cell than classical Tcm. This distinction is supported by clear transcriptional differences between Tscm and Tcm. However, Galletti et al. show that Tcm are contaminated by GzmK-expressing cells and that upon their removal, Tscm and Tcm look alike. This really questions that concept of Tscm and I think this important correction should be more prominently featured in the manuscript.

Overall, I think the manuscript is timely and has significant and highly important messages. I have only two major points and several minor points to be addressed upon revision.

Major points:

- I need to admit that I was slightly overwhelmed by the phenotyping data that are extensively discussed on the first 5 pages of the MS. I mean I fully appreciate the efforts of the authors to illustrate their strategy, but one needs to go through quite a bit of information of which the significance is not always very clear. Restructuring and streamlining these sections would presumably be appreciated by a broader reader audience.
- I also think that the abstract and title are slightly generic and need to better feature the key conclusion of the study.
- One key limitation is that the authors want to make a broadly applicable conclusion about the existence of this exhausted precursor population among healthy individuals. What remains slightly unclear is how broadly applicable this conclusion is. So far, too little information is provided about the donor cells taken from Fig 1a. How many patients were

used? Age? Sex? Random selection of patients? I think some more evidence or information is needed to generalize these findings.

Minor points:

- The authors talk about "early differentiated memory T cell pool" and "long-lived memory T cell pool". It would be helpful to better explain the use to the terminology.
- The line "Overall, these data suggest transcriptional heterogeneity in the 22 early differentiated memory T cell pool (Fig. 1, B and D, and Supplementary Table 1)" is unclear
- The authors introduce a lot of surface markers and then there are some inconsistencies with the markers they are using to label a specific population.
- Page 3 - Line 6: it is unclear what they mean when they state "memory populations are thought to be organized in a developmental hierarchy analogous to somatic tissues"
- Figure 2: the gating strategy and populations definition are unclear and difficult to follow. Maybe a comprehensive gating tree might help visualize these different populations.
- Figure 2D: Is there also some cytokine expression data? IFN $\gamma$ , TNF $\alpha$ ?
- Page 10 line 13 "produced cytokines more frequently" – suggests that these cells produce cytokines more commonly or often with respect to time. I think the authors mean at a higher frequency?
- Figure 3J: was there any phenotypic flow analysis on these T cells after the experiment?
- Fig 4j: is there any later time points for this data? It looks like the RLU of the Tscm is catching up to the Tmex at later time points.
- Figure 5: It could be informative to compare single cell data from Tmex and Tscm to data that is already in the literature from exhausted progenitors (in the setting of tumor or chronic infection) and Tscm (in acute infection).

Reviewer #2:

Remarks to the Author:

Galletti, et al., "Two subsets of stem-like CD8+ memory T cell progenitors with distinct fate commitments in humans"

Galletti and colleagues describe studies of novel human memory CD8+ T cell subsets that possess differential characteristics within classically defined central memory CD8+ T cells, as defined by CCR7 and CD45RA/RO. Through a large scRNAseq (10X genomics) approach, they identify a set of 10 bulk clusters of unique CD8+ T cell signatures, and define the transcriptomic properties of each. They develop a flow based panel employing some of the core differential signatures and use this to identify within central memory T cells the presence of two subsets that have a differential exhaustion state. One population carries signatures related to stem cell memory T cells (Tscm), originally defined by the

senior author. The other population is more reminiscent of an exhausted phenotype, although it is perhaps not as exhausted as a classical Tex cell. However this new cell type, termed Tmex, does carry some classical signatures of exhaustion. The authors go into great detail to define the epigenetics and function of this subset through a variety of assays including adoptive transfer into humanized mice. They end by showing that antiviral CD8+ T cells (Rota, flu, CMV, EBV) can have this phenotype, and that it is enriched in EBV-specific cells.

Overall the work is of very high quality, the manuscript is very well written, and the figures look fantastic. The main concern I have here is the overall message. While maybe this subset has not been defined to this degree, it has been known for a very long time that Tcm cells can express inhibitory receptors, such as PD-1. It is therefore not entirely surprising that the individual cells bearing these inhibitory receptors would indeed have a differential transcriptomic and epigenetic signature. EBV specific cells are known also to be highly skewed towards a PD-1 expressing Tcm phenotype (R. Ahmed, JI). However, whether one can appropriately conclude that these are exhausted seems premature. EBV is very well controlled by CD8+ T cells in the vast majority of individuals, and perhaps the phenotypic nature of these PD-1 expressing Tcm-like cells reflects their lymphoid tissue trafficking ability thus enabling them to access the infected B cell populations. Altogether, though I find the work exceptionally high quality, the overall study seems relatively incremental towards redefining current models of CD8+ T cell differentiation.

#### Additional Specific Points:

- 1) Nomenclature: The authors propose a number of new abbreviations for their cell types, including Tmex and Tstem. I found this somewhat confusing in the context of all the other abbreviations used in the field. The Tstem population is a combination of Tscm and non-PD-1/TIGIT expressing Tcm. While I understand the rationale here to simplify, previous work by the senior author went to great lengths to define Tscm as an entirely unique subset, with greater stem-like properties compared to Tcm. This makes the data hard to interpret, as the Tstem population is a heterogenous population. The Tmex abbreviation, which originates from the Tex subset designation, is somewhat tricky as well, as it is part of the Tcm population. In addition, it is possible that the Tmex name might be offensive to some cultures, thus recommend changing this name.
- 2) Can the authors speculate on the increased CD69 upregulation apparent after stimulation? What function would this have? Would this enforce tissue residency, perhaps in response to antigen as cells travel through tissue?
- 3) Do the Tmex cells express CD28? The majority of Tcm do, but this is not clearly specified. This is relevant because of the stimulation protocols and the discrepancy stated between PMA/IM and anti-CD3/28 stimulation. If Tmex do not express CD28, one might expect them to not function as well without co-stimulation. Did the authors explore use of anti-CD49d, commonly used as an alternative co-stimulatory strategy for CD8s?
- 4) In Figure 3I, J, the authors show that by d28 circulating Tmex vs Tstem roughly equilibrate. Do the cells maintain their phenotype in vivo? In addition, the spleen does not seem to equilibrate. Do the authors have an explanation for this? The spleen is a heavily blood penetrated organ, and largely should reflect the composition of the blood. Can the authors differentiate CD8s in lymphoid follicles/white pulp from CD8s in the red pulp? Perhaps in these mice by d28 there are high numbers of follicles in the spleen that are better populated by the Tstem, rather than the Tmex? Or do the Tmex cells traffic into white pulp as well (presumably so due to presence of CCR7)?
- 5) In figure 5, HIV+ subjects are included- why? And were HIV-specific responses also examined?

6) For the TCR analysis, this was all done with bulk cells. Is there any evidence that the same clonotype can be found within Tstem and Tmex cells? The clonotyping data shown was all performed, seemingly, on bulk sorted cells. This is not sufficient to prove or disprove the model proposed in 5G. It is also possible that the Tmex are a subset of Tstem that simply has been driven further in response to chronic antigen. This is unfortunately nearly impossible to understand in humans, the presence of shared clonality within an antigen specific population could have occurred early yielding different subsets in a bifurcated model, or late in a linear model. However, as it stands now, the potential model in 5G is not supported by the data. Examining the clonotypes of antigen-specific Tstem vs. Tmex in the same individual would shed light on this, but still be difficult to interpret into a model.

**Author Rebuttal to Initial comments**

NI-A29689A

Galletti et al.

**Manuscript No. NI-A29689A****“Two subsets of stem-like CD8<sup>+</sup> memory T cell progenitors with distinct fate commitments in humans”**

Galletti et al.

Corresponding author: Enrico Lugli, Humanitas Clinical and Research Center, Milan, Italy

**Point-by-point response to Reviewers' comments****Reviewer #1**

(Remarks to the Author)

The study by Galletti uses a sophisticated state-of-the-art strategy of combining scRNAseq and high-dimensional flow cytometry profiling to resolve the heterogeneity of human memory T cells. They make the surprising discovery that the human memory population contains a subset that is transcriptionally, functionally and epigenetically very similar to the progenitors of T cell exhaustion found in chronic infection and tumors. Moreover, the authors show that these T cells bear a unique TCR repertoire. This points out that the cells develop independently from other memory populations and that they recognize a unique antigen-repertoire. The data is therefore an elegant demonstration that sheds new light on the phenomenon of T cell exhaustion. It points out that the phenotype we normally associate with rare or very specific diseases (certain chronic infections and cancer) are nothing uncommon. Instead, cells with features of T cell exhaustion seem to comprise a significant fraction of the normal T cell repertoire.

At the same time, I found another point very important and interesting, which the authors in my opinion did not feature prominently enough. It is widely believed that T<sub>scm</sub> constitute a superior quality of memory T cell than classical T<sub>cm</sub>. This distinction is supported by clear transcriptional differences between T<sub>scm</sub> and T<sub>cm</sub>. However, Galletti et al. show that T<sub>cm</sub> are contaminated by GzmK-expressing cells and that upon their removal, T<sub>scm</sub> and T<sub>cm</sub> look alike. This really questions that concept of T<sub>scm</sub> and I think this important correction should be more prominently featured in the manuscript.

Overall, I think the manuscript is timely and has significant and highly important messages. I have only two major points and several minor points to be addressed upon revision.

**Authors.** We emphasized these important concepts in the revised version of the Abstract, Introduction and Discussion. Concerning the presence of T cells with exhaustion-like features in healthy individuals, please also see our response to Reviewer 2 below. Reviewer 2 suggests that T<sub>mex</sub> have exhaustion traits but are probably not as exhausted as those T cells isolated from tumors or from chronic viral infections. We agree with this statement, thus, throughout the paper, we now refer to T<sub>mex</sub> as dysfunctional/exhaustion-like cells. This is also in line with a recent discussion with other leaders in the field (Blank et al, Nat Rev Immunol. 2019 Nov;19(11):665-674).

We agree with the Reviewer that clear transcriptional differences were identified between T<sub>scm</sub> and T<sub>cm</sub> in our paper by Gattinoni\*, Lugli\* et al, Nat Med. 2011 Sep 18;17(10):1290-7, **Figure 3d**. The surprising finding is that the majority of those genes now delineate the T<sub>stem</sub> and T<sub>mex</sub> subsets, specifically *TOX*, *TGFBR3*, *HNRNPLL*, *DUSP4*, *PRRL5*, *IGF1R* (all with q-val < 0.05; **Supplementary Table 4**), *PHACTR2*, *SLFN11*, *HMGB3*, *FCER1G* (all with p-val < 0.05; not shown). This is now briefly mentioned on page 9. These data demonstrate that the difference previously ascribed to T<sub>scm</sub> and T<sub>cm</sub> is mainly due to a contamination of the transcriptionally

7

NI-A29689A

Galletti et al.

distinct T<sub>mem</sub> population. We would like to stress that our new findings do not question the concept of T<sub>scm</sub>, rather define an improved strategy to expand the more functional stem-like T cell pool, with important practical consequences for translational applications.

#### Major points:

- I need to admit that I was slightly overwhelmed by the phenotyping data that are extensively discussed on the first 5 pages of the MS. I mean I fully appreciate the efforts of the authors to illustrate their strategy, but one needs to go through quite a bit of information of which the significance is not always very clear. Restructuring and streamlining these sections would presumably be appreciated by a broader reader audience.

**Authors.** We agree with the Reviewer that much information is included to describe the complex heterogeneity of the memory T cell compartment in humans. We modified the manuscript to focus on the most essential information that is important for the main message of the paper.

- I also think that the abstract and title are slightly generic and need to better feature the key conclusion of the study.

**Authors.** We thank the reviewer for suggesting these changes. We believe that the title reflects the main message. We slightly restructured the abstract to include suggestions mentioned above.

- One key limitation is that the authors want to make broadly applicable conclusion about the existence of this exhausted precursor population among healthy individuals. What remains slightly unclear is how broadly applicable this conclusion is. So far, too little information is provided about the donor cells taken from Fig 1a. How many patients were used? Age? Sex? Random selection of patients? I think some more evidence or information is needed to generalize these findings.

**Authors.** We thank the Reviewer for raising this aspect. We have expanded the Introduction and the Discussion to strengthen the concept that our improved identification of functional stem-like T cells (T<sub>stem</sub>) overcomes the paucity of T<sub>scm</sub> cells obtained *ex vivo*, and that we provide a defined molecular identity that should be obtained in manufacturing protocols to improve adoptive T cell transfer immunotherapy.

We have included more information on the selection of donors. In the scRNAseq experiment, we analyzed a cohort of 4 healthy females, aged 24-39 years old. These findings are then confirmed by high-dimensional flow cytometry in a larger cohort of 120 samples from blood bank donors (males and females), aged 18-65 years old and selected randomly, or cancer patients donating PB and tumor-free lymph node or lung samples (n=6 each). A detailed description of these samples is now included in **Supplementary Table 1**.

#### Minor points:

- The authors talk about “early differentiated memory T cell pool” and “long-lived memory T cell pool”. It would be helpful to better explain the use of the terminology.

**Authors.** Both terms refer to the same concept. We unified the terminology (“early differentiated”) in the revised version of the manuscript.



NI-A29689A

Galletti et al.

- The line “Overall, these data suggest transcriptional heterogeneity in the early differentiated memory T cell pool (Fig. 1, B and D, and Supplementary Table 1)” is unclear

**Authors.** We removed this statement in the revised version of the manuscript.

- The authors introduce a lot of surface markers and then there are some inconsistencies with the markers they are using to label a specific population.

**Authors.** We believe the Reviewer has possibly missed the gating strategy used to define and isolate the different memory T cell populations (**Supplementary Fig. 1**). We have edited the text for ease of understanding. It is unclear if additional changes are requested.

- Page 3 - Line 6: it is unclear what they mean when they state “memory populations are thought to be organized in a developmental hierarchy analogous to somatic tissues”

**Authors.** We thank the Reviewer for raising this aspect. We removed our statement on somatic tissues as this is irrelevant for the message of the paper.

- Figure 2: the gating strategy and populations definition are unclear and difficult to follow. Maybe a comprehensive gating tree might help visualize these different populations.

**Authors.** We apologize that this was not clear. Please see our response above on this regard: a gating tree identifying the T cell subsets isolated in our study has been originally included in **Supplementary Fig. 1**.

- Figure 2D: Is there also some cytokine expression data? IFN $\gamma$ , TNF $\alpha$ ?

**Authors.** We did not perform analysis of effector cytokine production by FACS following activation of T cell subsets with anti-CD3/28 as in Figure 2D. In particular, we thought there was no need to investigate cytokine production capacity of Tsem and Tcm depleted of the PD-1+ TIGIT+ (Tmex) population, as these subsets were highly similar in terms of gene expression profiles *ex vivo* and proliferation capacity *in vitro*. Instead, data on cytokine production capacity of Tmex vs Tstem following activation *in vitro* with anti-CD3/28 for 4 days can be extrapolated from transcriptional profiling in **Figure 4h** and **Supplementary Table 4**. While we could not find differences in IFN $\gamma$  and TNF, we instead found significant increased expression of *IL2* (in line with functional data *ex vivo* shown in **Figure 3**), *CSF2* (encoding GM-CSF) and *GZMB* mRNA in Tstem compared to Tmex (**Figure 4h**). In a similar experiment, Tstem produced more GZMB compared to Tmex, as measured by flow cytometry (**Figure 4e**). Overall, these data highlight an increased functional/killing capacity of Tstem vs. Tmex, also confirmed *in vivo* in an adoptive T cell transfer model of leukemia (**Figure 4j**).

- Page 10 line 13 “produced cytokines more frequently” – suggests that these cells produce cytokines more commonly or often with respect to time. I think the authors mean at a higher frequency?

**Authors.** The Reviewer is correct. We corrected the statement.

- Figure 3J: was there any phenotypic flow analysis on these T cells after the experiment?

**Authors.** We thank Reviewer 1, together with Reviewer 2, for this question. We have performed extensive phenotypic analysis of the T cells transferred to NSG mice, and we did not find major

NI-A29689A

Galletti et al.

differences as far as their distribution among memory phenotypes is concerned. In our hands, T cells always acquire an activated, CCR7<sup>-</sup> CD45RO<sup>+</sup> effector phenotype in these mice, irrespectively of the phenotype of origin (**Extended Figure 14** in Gattinoni\*, Lugli\* et al, Nat Med, 2011 Sep18;17(10):1290-7). Therefore, this model is inadequate to test T cell self-renewal in vivo because of the excessive immune activation occurring in a xenogeneic environment. The long-term repopulation experiment (informing on long-term persistence) performed in **Figure 3** and showing that Tstem are superior to Tmex, is an alternative approach to overcome this limitation. The phenotypic profiles of the transferred cells are not mentioned in the manuscript because they are not instrumental for the overall message of the paper. We will be happy to include such data in further Supplementary Figures should the Reviewer think this is important.

- Fig 4j: is there any later time points for this data? It looks like the RLU of the Tscm is catching up to the Tmex at later time points.

**Authors.** Unfortunately, longer follow-up is not available. As stated in Methods, we stopped follow-up and sacrificed mice to collect organs when RLU values  $\geq 10^6$  were observed in more than 75% of mice in one of the treated groups.

- Figure 5: It could be informative to compare single cell data from Tmex and Tscm to data that is already in the literature from exhausted progenitors (in the setting of tumor or chronic infection) and Tscm (in acute infection).

**Authors.** To avoid possible technical bias resulting from merging data from independent studies (such as subsets from acute and chronic infections), we used scRNAseq of melanoma TILs from Sade-Feldman et al., Cell. 2019 Jan 10;176(1-2):404 and identified signatures of CCR7<sup>+</sup> GZMK<sup>-</sup> memory-like and of CCR7<sup>+</sup> GZMK<sup>+</sup> TCF7<sup>+</sup> progenitor-exhausted CD8<sup>+</sup> T cells (clusters G10 and G5, respectively, from **Figure 1c** and Supplementary Table 1). We have previously shown that progenitor exhausted/stem-like CD8<sup>+</sup> T cells from lung and melanoma tumors also express GZMK (detected by scRNAseq) and the inhibitory receptors PD-1 and TIGIT (detected by flow cytometry), and share identity with TCF-1<sup>+</sup> TIM3<sup>-</sup> progenitors from chronic LCMV infection (Brummelman J et al, J Exp Med. 2018 Oct 1;215(10):2520-2535). The CCR7<sup>+</sup> GZMK<sup>-</sup> memory-like gene signature overlaps with the Tstem gene signature, while the CCR7<sup>+</sup> GZMK<sup>+</sup> TCF7<sup>+</sup> progenitor-exhausted gene signature overlaps with the Tmex gene signature (p-val= 4.7e-19 and 7.1e-28, respectively; hypergeometric test). These results, along with the lists of overlapping genes, are shown in **Supplementary Table 4** and mentioned on page 10 of the manuscript. Please note that we already compared the Tstem signature to that of antigen-specific Tscm induced by vaccination, and showed that these have a shared identity (FDR=0.002, **Figure 5a**).

NI-A29689A

Galletti et al.

**Reviewer #2**

(Remarks to the Author)

Galletti, et al., “Two subsets of stem-like CD8+ memory T cell progenitors with distinct fate commitments in humans”

Galletti and colleagues describe studies of novel human memory CD8+ T cell subsets that possess differential characteristics within classically defined central memory CD8+ T cells, as defined by CCR7 and CD45RA/RO. Through a large scRNAseq (10X genomics) approach, they identify a set of 10 bulk clusters of unique CD8+ T cell signatures, and define the transcriptomic properties of each. They develop a flow based panel employing some of the core differential signatures and use this to identify within central memory T cells the presence of two subsets that have a differential exhaustion state. One population carries signatures related to stem cell memory T cells (Tstem), originally defined by the senior author. The other population is more reminiscent of an exhausted phenotype, although it is perhaps not as exhausted as a classical T<sub>ex</sub> cell. However this new cell type, termed T<sub>mex</sub>, does carry some classical signatures of exhaustion. The authors go into great detail to define the epigenetics and function of this subset through a variety of assays including adoptive transfer into humanized mice. They end by showing that antiviral CD8+ T cells (Rota, flu, CMV, EBV) can have this phenotype, and that it is enriched in EBV-specific cells.

Overall the work is of very high quality, the manuscript is very well written, and the figures look fantastic. The main concern I have here is the overall message. While maybe this subset has not been defined to this degree, it has been known for a very long time that T<sub>cm</sub> cells can express inhibitory receptors, such as PD-1. It is therefore not entirely surprising that the individual cells bearing these inhibitory receptors would indeed have a differential transcriptomic and epigenetic signature. EBV specific cells are known also to be highly skewed towards a PD-1 expressing T<sub>cm</sub> phenotype (R. Ahmed, JJ). However, whether one can appropriately conclude that these are exhausted seems premature. EBV is very well controlled by CD8+ T cells in the vast majority of individuals, and perhaps the phenotypic nature of these PD-1 expressing T<sub>cm</sub>-like cells reflects their lymphoid tissue trafficking ability thus enabling them to access the infected B cell populations. Altogether, though I find the work exceptionally high quality, the overall study seems relatively incremental towards redefining current models of CD8+ T cell differentiation.

Additional Specific Points:

1) Nomenclature: The authors propose a number of new abbreviations for their cell types, including T<sub>mex</sub> and T<sub>stem</sub>. I found this somewhat confusing in the context of all the other abbreviations used in the field. The T<sub>stem</sub> population is a combination of T<sub>cm</sub> and non-PD-1/TIGIT expressing T<sub>cm</sub>. While I understand the rationale here to simplify, previous work by the senior author went to great lengths to define T<sub>cm</sub> as an entirely unique subset, with greater stem-like properties compared to T<sub>cm</sub>. This makes the data hard to interpret, as the T<sub>stem</sub> population is a heterogenous population. The T<sub>mex</sub> abbreviation, which originates from the T<sub>ex</sub> subset designation, is somewhat tricky as well, as it is part of the T<sub>cm</sub> population. In addition, it is possible that the T<sub>mex</sub> name might be offensive to some cultures, thus recommend changing this name.

**Authors.** We thank the Reviewer for the appreciation of our work and for raising specific points. The Reviewer claims that it is known that T<sub>cm</sub> can express PD-1 and it is not entirely surprising that these cells are transcriptionally and epigenetically distinct. S/he also claims that antigen-specific cells can control EBV in vivo despite high PD-1 expression.

11

The central questions, in the opinion of the authors, are if stem-like T cells with dysfunctional/exhaustion-like features can be identified also in healthy individuals, have reduced functionality and have a distinct fate commitment compared to conventional, stem-like memory cells. Our results demonstrate that Tscm and Tcm-phenotype cells expressing PD-1 (Tmex) are functionally inferior at multiple levels compared to those lacking these inhibitory receptors (the Tstem). Most importantly, epigenetic modifications at exhaustion and effector-related loci specifically found in Tmex are inherited by the progeny, thereby suggesting that epigenetic modifications may constitute a major barrier to reprogramming towards a functional state, as described for Tex in chronic infections (Pauken KE, Science. 2016 Dec 2;354(6316):1160-1165). The additional finding that the TCR repertoire of Tstem and Tmex is largely (~95%) non-overlapping (**Figure 5e**) indicates that Tstem and Tmex are not mere distinct functional states, rather they recognize a relatively unique antigen repertoire.

Although not addressed directly in our work, we agree with the Reviewer that Tmex are not as exhausted as a classical Tex cells. Throughout the paper, we now refer to these cells as dysfunctional/exhausted-like, as some authors describe Tex as cells with unconventional/divergent functions rather than with diminished functions (Blank et al, Nat Rev Immunol. 2019 Nov;19(11):665-674). However, please note that TCF-1+ progenitors in tumors or chronic viral infections maintain some degree of functionality and persistence compared to terminally differentiated Tex, and for this reason they are generally referred to as stem-like (reviewed in Lugli et al., Trends Immunol, 2020; Kallies et al. Nat Rev Immunol. 2020 Feb;20(2):128-136; Held W, Sci Transl Med. 2019 Oct 23;11(515):eaay6863). It is thus inherently difficult to adopt a nomenclature that fully describes these characteristics. We thank the Reviewer for suggesting that the term Tmex might not be appropriate. We propose to change the name to “progenitors of exhausted T cells”, or “Tpex”, as recently proposed in a consensus review with leaders in the field (Blank et al, Nat Rev Immunol. 2019 Nov;19(11):665-674) and by Kallies and colleagues (Kallies et al. Nat Rev Immunol. 2020 Feb;20(2):128-136).

The Reviewer also asserts that the Tstem described in this study is heterogeneous, because comprising Tscm and non-PD-1/TIGIT-expressing Tcm. However, our data support the opposite conclusion, i.e., that Tscm and Tcm depleted of the Tmex are instead the same population, both transcriptionally and functionally (**Figure 1 and 2**). Rather, Tcm, that are generally referred to as a homogeneous population in humans, preferentially include Tmex that are transcriptionally, epigenetically and functionally distinct. Notably, those genes previously found differentially expressed by Tscm and Tcm in our original report (see **Figure 3d**, Gattinoni\*, Lugli\* et al, Nat Med. 2011 Sep 18;17(10):1290-7) are indeed signature genes of the Tmex population in this study (please also see our detailed response to Reviewer 1 in this regard). Thus, our data do not question the concept of Tscm, rather define an improved strategy to expand the stem-like T cell pool with superior functional capacity.

In conclusion, the discovery of a shared identity of Tscm and Tcm cells, and of a novel subset of stem-like T cells hard-wired to its dysfunctional/exhaustion-like state in healthy humans are unprecedented aspects of human T cell biology that shed light on the mechanisms leading to long term protective immunity.

2) Can the authors speculate on the increased CD69 upregulation apparent after stimulation? What function would this have? Would this enforce tissue residency, perhaps in response to antigen as cells travel through tissue?

**Authors.** CD69 has been historically used as an activation marker of in vitro activated T cells. It is difficult to speculate about the tissue resident differentiation potential of Tstem and Tmex only on the basis of this marker. In **Figure 1h-i**, we have shown that these subsets are mostly found in LNs

NI-A29689A

Galletti et al.

where they are virtually negative for the tissue residency markers CD69 and CD103. A similar profile is found in the bone marrow. Unfortunately, the virtual absence of Tstem and Tmex in the lung (<1% of the total memory CD8+ T cells) does not allow a reliable evaluation of the expression of CD69 and CD103 in these cells. Therefore, we would avoid to speculate in this regard in the absence of definitive data.

3) Do the Tmex cells express CD28? The majority of Tcm do, but this is not clearly specified. This is relevant because of the stimulation protocols and the discrepancy stated between PMA/IM and anti-CD3/28 stimulation. If Tmex do not express CD28, one might expect them to not function as well without co-stimulation. Did the authors explore use of anti-CD49d, commonly used as an alternative co-stimulatory strategy for CD8s?

**Authors.** Both Tstem and Tmex express CD28 at equivalent levels (please see UMAP analysis in **Figure 1h** and our statement on page 7 line 15. We did not explore CD49d, or other costimulatory receptors. However, we did not see differences in *ITGA4* (encoding CD49d) mRNA or mRNAs of other costimulatory molecules in RNAseq data, both ex vivo (**Figure 2c**) and after stimulation in vitro (**Figure 4h**).

4) In Figure 3I, J, the authors show that by d28 circulating Tmex vs Tstem roughly equilibrate. Do the cells maintain their phenotype in vivo? In addition, the spleen does not seem to equilibrate. Do the authors have an explanation for this? The spleen is a heavily blood penetrated organ, and largely should reflect the composition of the blood. Can the authors differentiate CD8s in lymphoid follicles/white pulp from CD8s in the red pulp? Perhaps in these mice by d28 there are high numbers of follicles in the spleen that are better populated by the Tstem, rather than the Tmex? Or do the Tmex cells traffic into white pulp as well (presumably so due to presence of CCR7)?

**Authors.** Please see response to Reviewer 1 above regarding the phenotype of the transferred T cell subsets in NSG mice. Although we could not follow these mice longer than 28 days because of possible xenoGVHD reactions, dynamics in the blood suggest that Tstem and Tmex tend to equilibrate not only because of the late expansion of the Tmex, but also because of the contraction of Tstem, likely due to their rapid proliferation in vivo. However, the number of human T cells recovered from the spleen largely exceeded that from the blood (10 to 20 times depending on the transferred cell type), thus stressing the importance of the difference found between Tstem and Tmex numbers in the spleen at sacrifice. Differentiating between CD8 in the white vs red pulp in the NSG model is probably not optimal in the opinion of the authors. In fact, NSG mice lack T and B cells, preventing the formation of murine lymphoid follicles. The infusion of human PBMCs in NSG mice results in poor engraftment of B cells in these mice, generating poorly organized germinal centers (Shultz L.D. et al., Nat Rev Immunol, 2012, Nov;12(11):786-98). Accordingly, the vast majority (>95%) of cells in the spleens at sacrifice were CD3+, thus suggesting that lymphoid follicles are largely under-represented. Finally, CCR7 is rapidly downregulated following adoptive transfer due to immune activation, thus possibly questioning its role in trafficking.

5) In figure 5, HIV+ subjects are included- why? And were HIV-specific responses also examined?

**Authors.** Analysis of HIV- and HIV+ individuals revealed overlapping phenotypic profiles of antigen-specific CD8+ T cells, thus results were combined. Unfortunately, we do not have data on HIV-specific T cell responses that we can rapidly include in a revised version of the manuscript.

13

NI-A29689A

Galletti et al.

In any case, a predominant PD-1+ TIGIT+ (T<sub>mex</sub>) rather than a PD-1- TIGIT- (T<sub>stem</sub>) profile is expected in HIV-specific CD8+ T cells from these individuals, on the basis of previous data (Chew GM, et al, PLoS Pathog. 2016 Jan 7;12(1):e1005349).

6) For the TCR analysis, this was all done with bulk cells. Is there any evidence that the same clonotype can be found within T<sub>stem</sub> and T<sub>mex</sub> cells? The clonotyping data shown was all performed, seemingly, on bulk sorted cells. This is not sufficient to prove or disprove the model proposed in 5G. It is also possible that the T<sub>mex</sub> are a subset of T<sub>stem</sub> that simply has been driven further in response to chronic antigen. This is unfortunately nearly impossible to understand in humans, the presence of shared clonality within an antigen specific population could have occurred early yielding different subsets in a bifurcated model, or late in a linear model. However, as it stands now, the potential model in 5G is not supported by the data. Examining the clonotypes of antigen-specific T<sub>stem</sub> vs. T<sub>mex</sub> in the same individual would shed light on this, but still be difficult to interpret into a model.

**Authors.** We understand the Reviewer's concern on the differentiation model proposed in **Figure 5g**. Only a minor proportion of clonotypes found in T<sub>stem</sub> is also found in T<sub>mex</sub> (~5% of the top 3000 clones, compared to ~17% of T<sub>stem</sub> vs T<sub>em</sub> and ~30% of T<sub>mex</sub> vs T<sub>em</sub>; **Figure 5e** and **5f**). Thus, although possible, identification of shared clonotypes between T<sub>stem</sub> and T<sub>mex</sub> is an infrequent event. We agree with the Reviewer that T<sub>mex</sub> can ideally form from differentiated T<sub>stem</sub> following chronic exposure to antigen at high dose, as previously outlined in mice chronically infected with LCMV by Ahmed and colleagues (West E, Immunity. 2011 Aug 26;35(2):285-98). We edited our model and the Discussion to include this aspect. Although our data cannot formally exclude it, the T<sub>mex</sub>→T<sub>stem</sub> transition is instead unlikely to occur, as T<sub>mex</sub>-specific epigenetic modifications are inherited in the progeny following stimulation (**Figure 4** and **Supplementary Figure 4**). This is in line with previous findings showing the phenotypic (Utzschneider DT, Nat Immunol. 2013 Jun;14(6):603-10) and epigenetic (Pauken KE, Science. 2016 Dec 2;354(6316):1160-1165; Ghoneim HE et al, Cell. 2017 Jun 29;170(1):142-157.e19) stability of the exhausted CD8+ T cell lineage.

**Decision Letter, first revision:****Subject:** Nature Immunology - NI-A29689B pre-edit**Message:** Our ref: NI-A29689B

30th Jul 2020

Dear Dr. Lugli,

Thank you for your patience as we've prepared the guidelines for final submission of your Nature Immunology manuscript, "Two subsets of stem-like CD8+ memory T cell progenitors with distinct fate commitments in humans" (NI-A29689B). Please follow the instructions provided here and in the attached files, as the formal acceptance of your manuscript will be delayed if these issues are not addressed.

When you upload your final materials, please include a point-by-point response to the points below. We won't be able to proceed further without this detailed response.

General formatting:

1. Please include a separate "Data availability" subsection at the end of your Online Methods. This section should inform our readers about the availability of the data used to support the conclusions of your study and should include references to source data, accession codes to public repositories, URLs to data repository entries, dataset DOIs, and any other statement about data availability. We strongly encourage submission of source data (see below) for all your figures. At a minimum, you should include the following statement: "The data that support the findings of this study are available from the corresponding author upon request", mentioning any restrictions on availability. If DOIs are provided, these should be included in the Reference list (authors, title, publisher (repository name), identifier, year). For more guidance on how to write this section please see: <http://www.nature.com/authors/policies/data/data-availability-statements-data-citations.pdf>.
2. Your abstract must be fewer than 150 words and should not include citations.
3. As a guideline, Articles allow up to 50 references in the main text. An additional 20 references can be included in the Online Methods. Only papers that have been published or accepted by a named publication or recognized preprint server should be in the numbered list. Published conference abstracts, numbered patents and research data sets that have been assigned a digital object identifier may be included in the reference list.
4. All references must be cited in numerical order. Place Methods-only references after the Methods section and continue the numbering of the main reference list (i.e., do not start at 1).
5. Genes must be clearly distinguished from gene products (e.g., "gene Abc encodes a kinase," not "gene Abc is a kinase"). For genes, provide database-approved official

symbols (e.g., NCBI Gene, <http://www.ncbi.nlm.nih.gov/gene>) for the relevant species the first time each is mentioned; gene aliases may be used thereafter. Italicize gene symbols and functionally defined locus symbols; do not use italics for proteins, noncoding gene products and spelled-out gene names.

#### Figures and Tables:

6. All figures and tables, including Extended Data, must be cited in the text in numerical order.

7. Figure legends should be concise. Begin with a brief title and then describe what is presented in the figure and detail all relevant statistical information, avoiding inappropriate methodological detail.

8. All relevant figures must have defined error bars.

9. Graph axes should start at zero and not be altered in scale to exaggerate effects. A 'broken' graph can be used if absolutely necessary due to sizing constraints, but the break must be visually evident and should not impinge on any data points.

10. All bar graphs should be converted to a dot-plot format or to a box-and-whisker format to show data distribution. All box-plot elements (center line, limits, whiskers, points) should be defined.

11. When submitting the revised version of your manuscript, please pay close attention to our [href="https://www.nature.com/nature-research/editorial-policies/image-integrity"](https://www.nature.com/nature-research/editorial-policies/image-integrity) Digital Image Integrity Guidelines. and to the following points below:

- that unprocessed scans are clearly labelled and match the gels and western blots presented in figures.
- that control panels for gels and western blots are appropriately described as loading on sample processing controls
- all images in the paper are checked for duplication of panels and for splicing of gel lanes.

Finally, please ensure that you retain unprocessed data and metadata files after publication, ideally archiving data in perpetuity, as these may be requested during the peer review and production process or after publication if any issues arise.

#### Statistics and Reproducibility:

12. The Methods must include a statistics section where you describe the statistical tests used. For all statistics (including error bars), provide the EXACT n values used to calculate the statistics (reporting individual values rather than a range if n varied among experiments) AND define type of replicates (e.g., cell cultures, technical replicates). Please avoid use of the ambiguous term "biological replicates"; instead state what constituted the replicates (e.g., cell cultures, independent experiments, etc.). For all representative results, indicate number of times experiments were repeated, number of images collected, etc. Indicate statistical tests used, whether the test was one- or two-tailed, exact values



for both significant and non-significant P values where relevant, F values and degrees of freedom for all ANOVAs and t-values and degrees of freedom for t-tests.

13. **Reporting Guidelines**– Attached you will find an annotated version of the Reporting Summary you submitted, along with a Word document indicating revisions that need to be made in compliance with our reproducibility requirements. These documents detail any changes that will need to be made to the text, and particularly the main and supplementary figure legends, including (but not limited to) details regarding sample sizes, replication, scale and error bars, and statistics. Please use these documents as a guide when preparing your revision and submit an updated Reporting Summary with your revised manuscript. The Reporting Summary will be published as supplementary material when your manuscript is published.

Please provide an updated version of the Reporting Summary and Editorial Policy Checklist with your final files and include the following statement in the Methods section to indicate where this information can be found: "Further information on research design is available in the Nature Research Reporting Summary linked to this article."

The Reporting Summary and Editorial Policy Checklist can be found here:

<https://www.nature.com/authors/policies/ReportingSummary.pdf>

<https://www.nature.com/documents/nr-editorial-policy-checklist.pdf>

Note that these forms are smart "dynamic" PDFs which cannot be opened by most web browsers. Download them or right-click and choose "save as" in order to save them to your computer desktop and fill them in using Adobe Acrobat.

Supplementary Information:

All Supplementary Information must be submitted in accordance with the instructions in the attached Inventory of Supporting Information, and should fit into one of three categories:

**25 EXTENDED DATA:** Extended Data are an integral part of the paper and only data that directly contribute to the main message should be presented. These figures will be integrated into the full-text HTML version of your paper and will be appended to the online PDF. There is a limit of 10 Extended Data figures, and each must be referred to in the main text. Each Extended Data figure should be of the same quality as the main figures, and should be supplied at a size that will allow both the figure and legend to be presented on a single legal-sized page. Each figure should be submitted as an individual .jpg, .tif or .eps file with a maximum size of 10 MB each. All Extended Data figure legends must be provided in the attached Inventory of Accessory Information, not in the figure files themselves.

**26 SUPPLEMENTARY INFORMATION:** Supplementary Information is material that is essential background to the study but which is not practical to include in the printed version of the paper (for example, video files, large data sets and calculations). Each item must be referred to in the main manuscript and detailed in the attached Inventory of Accessory Information. Tables containing large data sets should be in Excel format, with the table number and title included within the body of the table. All textual information and any additional Supplementary Figures (which should be presented with the legends directly below each figure) should be provided as a single, combined PDF. Please note that we cannot accept resupplies of Supplementary Information after the paper has been

formally accepted unless there has been a critical scientific error.

All Extended Data must be called out in your manuscript and cited as Extended Data 1, Extended Data 2, etc. Additional Supplementary Figures (if permitted) and other items are not required to be called out in your manuscript text, but should be numerically numbered, starting at one, as Supplementary Figure 1, not SI1, etc.

**27 SOURCE DATA:** We encourage you to provide source data for your figures whenever possible. Full-length, unprocessed gels and blots must be provided as source data for any relevant figures, and should be provided as individual PDF files for each figure containing all supporting blots and/or gels with the linked figure noted directly in the file. Statistics source data should be provided in Excel format, one file for each relevant figure, with the linked figure noted directly in the file. For imaging source data, we encourage deposition to a relevant repository, such as figshare (<https://figshare.com/>) or the Image Data Resource (<https://idr.openmicroscopy.org>).

Other

**28** As mentioned in our previous letter, all corresponding authors on a manuscript should have an ORCID – please visit your account in our manuscript system to link your ORCID to your profile, or to create one if necessary. For more information please see our previous letter or visit [www.springernature.com/orcid](http://www.springernature.com/orcid).

**29** Nature Research journals [encourage authors to share their step-by-step experimental protocols](https://www.nature.com/nature-research/editorial-policies/reporting-standards#protocols) on a protocol sharing platform of their choice. Nature Research's Protocol Exchange is a free-to-use and open resource for protocols; protocols deposited in Protocol Exchange are citable and can be linked from the published article. More details can found at [www.nature.com/protocolexchange/about](https://www.nature.com/protocolexchange/about).

### 30 TRANSPARENT PEER REVIEW

{*journal\_name*} offers a transparent peer review option for new original research manuscripts submitted from 1st December 2019. We encourage increased transparency in peer review by publishing the reviewer comments, author rebuttal letters and editorial decision letters if the authors agree. Such peer review material is made available as a supplementary peer review file. **Please state in the cover letter 'I wish to participate in transparent peer review' if you want to opt in, or 'I do not wish to participate in transparent peer review' if you don't.** Failure to state your preference will result in delays in accepting your manuscript for publication.

Please note: we allow redactions to authors' rebuttal and reviewer comments in the interest of confidentiality. If you are concerned about the release of confidential data, please let us know specifically what information you would like to have removed. Please note that we cannot incorporate redactions for any other reasons. Reviewer names will be published in the peer review files if the reviewer signed the comments to authors, or if reviewers explicitly agree to release their name. For more information, please refer to our [FAQ page](https://www.nature.com/documents/nr-transparent-peer-review.pdf).

In addition to addressing these points, please refer to the attached policy and rights worksheet, which contains information on how to comply with our legal guidelines for publication and describes the files that you will need to upload prior to final acceptance. You must initial the relevant portions of this checklist, sign it and return it with your final files. I have also attached a formatting guide for you to consult as you prepare the revised manuscript. Careful attention to this guide will ensure that the production process for your paper is more efficient.

Nature Immunology offers a transparent peer review option for new original research manuscripts submitted from 1st December 2019. We encourage increased transparency in peer review by publishing the reviewer comments, author rebuttal letters and editorial decision letters if the authors agree. Such peer review material is made available as a supplementary peer review file. **Please state in the cover letter 'I wish to participate in transparent peer review' if you want to opt in, or 'I do not wish to participate in transparent peer review' if you don't.** Failure to state your preference will result in delays in accepting your manuscript for publication.

Please note: we allow redactions to authors' rebuttal and reviewer comments in the interest of confidentiality. If you are concerned about the release of confidential data, please let us know specifically what information you would like to have removed. Please note that we cannot incorporate redactions for any other reasons. Reviewer names will be published in the peer review files if the reviewer signed the comments to authors, or if reviewers explicitly agree to release their name. For more information, please refer to our [FAQ page](https://www.nature.com/documents/nr-transparent-peer-review.pdf).

Please use the following link for uploading these materials: [REDACTED]

We ask that you aim to return your revised paper within 7 days. If you have any further questions, please feel free to contact me.

Best regards,

Zoltan Fehervari, Ph.D.  
Senior Editor  
Nature Immunology

The Macmillan Building  
4 Crinan Street  
Tel: 212-726-9207  
Fax: 212-696-9752  
z.fehervari@nature.com

Reviewer #1:

Remarks to the Author:

This is an excellent manuscript that deserves to be published without delay. The presented data widely broadens our conceptual understanding of the phenomenon of T cell exhaustion. All of my question were fully answered and congratulation to the authors.

**Final Decision Letter:**

**Subject:** Decision on Nature Immunology submission NI-A29689C

**Message:** In reply please quote: NI-A29689C

Dear Dr. Lugli,

I am delighted to accept your manuscript entitled "Two subsets of stem-like CD8+ memory T cell progenitors with distinct fate commitments in humans" for publication in an upcoming issue of Nature Immunology.

The manuscript will now be copy-edited and prepared for the printer. Please check your calendar: if you will be unavailable to check the galley for some portion of the next month, we need the contact information of whom will be making corrections in your stead. When you receive your galleys, please examine them carefully to ensure that we have not inadvertently altered the sense of your text.

Acceptance is conditional on the data in the manuscript not being published elsewhere, or announced in the print or electronic media, until the embargo/publication date. These restrictions are not intended to deter you from presenting your data at academic meetings and conferences, but any enquiries from the media about papers not yet scheduled for publication should be referred to us.

The Author's Accepted Manuscript (the accepted version of the manuscript as submitted by the author) may only be posted 6 months after the paper is published, consistent with our [self-archiving embargo](http://www.nature.com/authors/policies/license.html).

Please note that the Author's Accepted Manuscript may not be released under a Creative Commons license. For Nature Research Terms of Reuse of archived manuscripts please see:

<http://www.nature.com/authors/policies/license.html#terms>

If you have posted a preprint on any preprint server, please ensure that the preprint details are updated with a publication reference, including the DOI and a URL to the published version of the article on the journal website.

Once your manuscript is typeset you will receive a link to your electronic proof via email within 20 working days, with a request to make any corrections within 48 hours. If you have queries at any point during the production process then please contact the production team at [rjsproduction@springernature.com](mailto:rjsproduction@springernature.com). Once your paper has been scheduled for online publication, the Nature press office will be in touch to confirm the details.

Your paper will be published online soon after we receive your corrections and will appear in print in the next available issue. The embargo is set at 16:00 London time (GMT)/11:00 am US Eastern time (EST) on the Monday of publication. Now is the time to inform your Public Relations or Press Office about your paper, as they might be interested in promoting its publication. This will allow them time to prepare an accurate and satisfactory press release. Include your manuscript tracking number (NI-A29689C) and the name of the journal, which they will need when they contact our office.

About one week before your paper is published online, we shall be distributing a press release to news organizations worldwide, which may very well include details of your work. We are happy for your institution or funding agency to prepare its own press release, but it must mention the embargo date and Nature Immunology. Our Press Office will contact you closer to the time of publication, but if you or your Press Office have any enquiries in the meantime, please contact [press@nature.com](mailto:press@nature.com).

If your paper includes color figures, please be aware that in order to help cover some of the additional cost of four-color reproduction, Nature Research charges our authors a fee for the printing of their color figures. Please contact our offices for exact pricing and details.

Also, if you have any spectacular or outstanding figures or graphics associated with your manuscript - though not necessarily included with your submission - we'd be delighted to consider them as candidates for our cover. Simply send an electronic version (accompanied by a hard copy) to us with a possible cover caption enclosed.

To assist our authors in disseminating their research to the broader community, our SharedIt initiative provides you with a unique shareable link that will allow anyone (with or without a subscription) to read the published article. Recipients of the link with a subscription will also be able to download and print the PDF.

As soon as your article is published, you will receive an automated email with your shareable link.

You can now use a single sign-on for all your accounts, view the status of all your manuscript submissions and reviews, access usage statistics for your published articles and download a record of your refereeing activity for the Nature journals.

If you have not already done so, we strongly recommend that you upload the step-by-step protocols used in this manuscript to the Protocol Exchange. Protocol Exchange is an open online resource that allows researchers to share their detailed experimental know-how. All uploaded protocols are made freely available, assigned DOIs for ease of citation and fully searchable through [nature.com](http://nature.com). Protocols can be linked to any publications in which they are used and will be linked to from your article. You can also establish a dedicated page to collect all your lab Protocols. By uploading your Protocols to Protocol Exchange, you are enabling researchers to more readily reproduce or adapt the methodology you use, as well as increasing the visibility of your protocols and papers. Upload your Protocols at [www.nature.com/protocolexchange/](http://www.nature.com/protocolexchange/). Further information can be found at [www.nature.com/protocolexchange/about](http://www.nature.com/protocolexchange/about) .

Please note that we encourage the authors to self-archive their manuscript (the accepted version before copy editing) in their institutional repository, and in their funders' archives, six months after publication. Nature Research recognizes the efforts of funding bodies to increase access of the research they fund, and strongly encourages authors to participate in such efforts. For information about our editorial policy, including license agreement and author copyright, please visit [www.nature.com/ni/about/ed\\_policies/index.html](http://www.nature.com/ni/about/ed_policies/index.html)

An online order form for reprints of your paper is available at <https://www.nature.com/reprints/author->

[reprints.html](https://www.nature.com/reprints/author-reprints.html)><https://www.nature.com/reprints/author-reprints.html></a>. Please let your coauthors and your institutions' public affairs office know that they are also welcome to order reprints by this method.

Sincerely,

Zoltan Fehervari, Ph.D.  
Senior Editor  
Nature Immunology

The Macmillan Building  
4 Crinan Street  
Tel: 212-726-9207  
Fax: 212-696-9752  
z.fehervari@nature.com
